# Supplementary material for: Student feedback experiences in a cross-border medical education curriculum
Source: PubMed Central journal article supplement (PMC6766385; doi:10.5116/ijme.5ce1.149f), 2019-05-24
Supplement: ijme-10-93-S1.pdf [file ijme-10-93-S1.pdf]

## **Appendix 1**

### **Focus Group Topic Guide**

#### Engagement Questions

1. How do you feel clinical supervisor feedback can benefit your professional training?
2. In your opinion, what type of feedback do you consider “fair”?

#### Exploration Questions

3. What do you think contributes to a positive feedback experience?
4. What do you think contributes to a negative feedback experience?
5. What are your preferences for receiving a) written and verbal feedback; b) positive and negative feedback?
6. What are your experiences giving feedback to clinical preceptors?

#### Exit Questions

7. Is there anything you would like to add about the feedback processes or your experiences?
